# Supplementary material for: GIS applications in volcano monitoring: the study of seismic swarms at the Campi Flegrei volcanic complex, Italy
Source: Copernicus journal article supplement (doi:10.5194/adgeo-52-131-2021), 2021-02-23
Supplement: Supplementary file 1 [file adgeo-52-131-2021-supplement.zip]

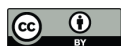

*Supplement of*

## **GIS applications in volcano monitoring: the study of seismic swarms at the Campi Flegrei volcanic complex, Italy**

**Eliaana Bellucci Sessa et al.**

*Correspondence to:* Eliaana Bellucci Sessa ([eliaana.bellucci@ingv.it](mailto:eliaana.bellucci@ingv.it))

- [adgeo-52-131-2021-supplement-title-page.pdf](#)
- [CF-swams.gif](#)

The copyright of individual parts of the supplement might differ from the CC BY 4.0 License.
